1 **In search of a core cellular network in single cell transcriptome data**

2 Ming Yang<sup>1</sup>, Benjamin R. Harrison<sup>1</sup>, Daniel E.L. Promislow<sup>1,2\*</sup>

3 <sup>1</sup>Department of Laboratory Medicine and Pathology, University of Washington School of  
4 Medicine, Seattle, WA 98195 USA

5 <sup>2</sup>Department of Biology, University of Washington, Seattle, WA 98195 USA

6

7 **\*Correspondence:**

8 Daniel Promislow

9 [promislo@uw.edu](mailto:promislo@uw.edu)

10 **Abstract**

11 **Background:** Along with specialized functions, cells of multicellular organisms also perform  
12 essential functions common to most if not all cells. Whether diverse cells do this by using the same  
13 set of genes, interacting in a fixed coordinated fashion to execute essential functions, remains a  
14 central question in biology. Single-cell RNA-sequencing (scRNA-seq) measures gene expression  
15 of individual cells, enabling researchers to discover gene expression patterns that contribute to the  
16 diversity of cell functions. Current analyses focus primarily on identifying differentially expressed  
17 genes across cells. However, patterns of co-expression between genes are probably more indicative  
18 of biological processes than are the expression of individual genes. Using single cell transcriptome  
19 data from the fly brain, here we focus on gene co-expression to search for a core cellular network.

20 **Results:** In this study, we constructed cell type-specific gene co-expression networks using single  
21 cell transcriptome data of brains from the fruit fly, *Drosophila melanogaster*. We detected a set of  
22 highly coordinated genes preserved across cell types in fly brains and defined this set as the core  
23 cellular network. This core is very small compared with cell type-specific gene co-expression  
24 networks and shows dense connectivity. Modules within this core are enriched for basic cellular  
25 functions, such as translation and ATP metabolic processes, and gene members of these modules  
26 have distinct evolutionary signatures.

27 **Conclusions:** Overall, we demonstrated that a core cellular network exists in diverse cell types of  
28 fly brains and this core exhibits unique topological, structural, functional and evolutionary  
29 properties.

## 30 **Keywords**

31 gene co-expression, co-expression network, core cellular network, single-cell transcriptome,  
32 phylostratigraphy, systems biology, *Drosophila melanogaster*.

33

## 34 **Background**

35 Life on Earth has gone through many transitions in organizational complexity (Smith and  
36 Szathmary 1997). Among these, the evolution of multicellularity stands out as a key milestone.  
37 This transition has occurred independently multiple times across the tree of life and paved the way  
38 for tremendous phenotypic expansion and biological diversification (Parfrey and Lahr 2013).  
39 Although this has led to the evolution of cell-type-specific regulatory pathways that define cells  
40 with vastly different functions, all cells in multicellular organisms also carry out common  
41 functions that are essential for cell survival. Whether these common functions are supported by a  
42 common core of genes functioning in all cells, coordinated to ensure survival in the face of diverse  
43 functional demands, remains a central question in biology (Lim, Lee, and Tang 2013; Hart and  
44 Alon 2013). In particular, do all cells utilize the same set of genes to accomplish common functions,  
45 and do these genes function in a fixed and coordinated fashion—a core regulatory network?

46 Cellular phenomena can be characterized by different levels of biological organization, or -  
47 omes, such as the genome, epigenome, transcriptome, proteome, etc. Investigating core functions  
48 from these different levels not only gives insight into essential functions of cellular life, but also  
49 helps to reveal the evolutionary forces acting at different levels of biological organization (Sorrells  
50 and Johnson 2015; Ghadie, Coulombe-Huntington, and Xia 2018; Wagner 2012). To identify core

51 functions at each level, researchers have used various strategies such as identifying constitutively  
52 active genes over temporal or spatial scales, and across environments. These genes are typically  
53 referred to as ‘housekeeping genes’ and are thought to perform essential functions. They tend to  
54 share aspects of sequence structure, chromatin environment and evolutionary history (Eisenberg  
55 and Levanon 2013; Rancati et al. 2018). For example, housekeeping genes are evolutionarily  
56 ancient (Zhu et al. 2008), exhibit a high level of evolutionary conservation (Zhang and Li 2004),  
57 and are enriched for several functions, including metabolism, RNA binding, protein degradation  
58 and cytoskeleton functions (Zhang and Li 2004; Lehner and Fraser 2004).

59 While core functions are often described based on 'housekeeping genes', we recognize that  
60 genes do not work in isolation, but work with each other to carry out biological processes.  
61 Individual molecular abundances alone cannot adequately capture biological organizations. High-  
62 throughput methods that generate high-dimensional ‘omic’ data have greatly increased our  
63 understanding of molecular and cellular function and organization, in particular through the  
64 analysis of molecular networks (Barabasi and Oltvai 2004; Proulx, Promislow, and Phillips 2005;  
65 Thompson, Regev, and Roy 2015; Promislow 2005). Studying core functions from a network  
66 perspective may provide novel insights into biological organization. Networks consist of nodes  
67 connected to one another by edges. In the search for the underlying molecular structure of cells,  
68 researchers have explored many different kinds of edges, including but not limited to gene co-  
69 expression, protein-protein interactions (PPI), interactions among transcription factors (TF), TF  
70 chromatin occupancy, miRNA-target gene interactions, metabolites covariation, and metabolic  
71 reactions (Mitra et al. 2013). For example, co-expression network analysis of human and  
72 *Arabidopsis* bulk transcriptome data has found a substantial number of gene pairs whose co-  
73 expression spans multiple datasets (Lee et al. 2004; He and Maslov 2016). In both analyses, gene

74 pairs expressed across samples were enriched in translation, DNA replication, and regulation of  
75 transcription functions, all generally considered to be core cellular functions. Recent studies of  
76 tissue-level transcriptome data have typically focused on tissue-specific networks (Greene et al.  
77 2015; Sonawane et al. 2017). For example, Skinnider et al. (2021) constructed tissue-specific PPI  
78 networks using co-immunoprecipitation within each of seven mouse tissues. They discovered core  
79 cellular modules, present in all mouse tissues, composed of evolutionarily ancient proteins, which  
80 contrasts with evolutionarily novel accessory modules that are found within individual tissues.

81 A major drawback of most previous studies is that the networks were inferred from bulk data,  
82 which profiles heterogeneous cell populations of an organism or in a tissue. Bulk samples face two  
83 main limitations for network construction. First, differences in cellular compositions between  
84 samples may confound covariation analysis (Farahbod and Pavlidis 2020). Second, measurements  
85 that are averaged over thousands of cells in bulk samples make it difficult to detect interactions  
86 between genes in individual cells, such as the presence of co-expression patterns and the cell-  
87 specificity of these interactions. Co-expression in particular is an indicator of functional  
88 relationships (Hughes et al. 2000), which from a network perspective can provide valuable insight  
89 into cell function (Barabasi and Oltvai 2004). The compendium of core housekeeping genes,  
90 initially characterized based on the consistency of their expression, may change based on further  
91 analyses of gene-gene relationships. For example, does each commonly expressed gene interact  
92 with other genes in a fixed and static manner in all cell types, or do the interactions themselves,  
93 which define the gene network structure, differ depending on the local cellular contexts? We can  
94 gain a clearer understanding of core gene regulatory networks through the analysis of single-cell  
95 sequencing data from a network perspective.

96 With the advent of single-cell RNA sequencing (scRNA-seq), we have an unprecedented  
97 opportunity to reveal gene relationships in specific cellular contexts and probe cellular-level  
98 networks (Trapnell 2015; Tanay and Regev 2017). One recent study used single cell data from  
99 mouse brain samples to construct gene co-expression networks and compared the topology of  
100 networks built from different cell type hierarchy levels (i.e., from broad to specific class, subclass,  
101 and cluster labels of cell types; Harris et al. 2021). Their results show a high preservation of gene-  
102 gene relationships at each hierarchy level and suggest the existence of a core co-regulatory network  
103 in the brain. However, they did not directly compare cellular networks across cell types to find  
104 commonality or describe a concrete core network with topological and functional features.

105 Taking together, the prior findings, and the considerable amount of scRNA-seq data now  
106 available, lead us to ask several fundamental questions: Can we identify shared co-expression  
107 patterns between pairs of genes across different cell types, how common are these specific  
108 connections across different cell types, do these shared co-expressed genes define a core cellular  
109 network, and if so, what properties does this core network manifest?

110 To investigate these questions, we used a published scRNA-seq dataset derived from whole  
111 fly brains (Davie et al. 2018) and constructed cell type-specific gene co-expression networks.  
112 Furthermore, we described the functional enrichment of this network, and the evolutionary age of  
113 its constituent genes. Gaining such information not only allows us to understand the composition  
114 and function of the detected core network, but also provides insight into the molecular organization  
115 of gene co-expression networks and the evolutionary origins of cellular functions. To our  
116 knowledge, this is the first study searching for a core cellular network among cell types using  
117 single cell data in the fly brain.

## 118 **Results**

### 119 **Construction of cell type-specific gene co-expression networks**

120 We selected an array of fly brain cell types and filtered expressed genes before network  
121 construction. The original dataset contained 17,473 gene expression profiles in 56,902 high-quality  
122 brain cells grouped into 116 cell clusters. We selected 33 known cell types that contained at least  
123 200 cells and filtered expressed genes in each cell type separately (**Methods and Figure S1**).  
124 Different cell types showed different numbers of expressed genes, ranging from a minimum of  
125 3,153 expressed genes in the Tm9 cell type, to a maximum of 6,725 expressed genes in the  
126 ensheathing glia cell type (**Figure 1**). In total, there were 8,013 genes expressed in at least one cell  
127 type, 2,368 of which were expressed in all 33 cell types (**Figure 1**). Throughout, we focus on these  
128 2,368 commonly expressed genes to identify covarying gene pairs within and across cell types.  
129 We used the bigScale2 algorithm (Iacono, Massoni-Badosa, and Heyn 2019) to identify the top 1%  
130 of highly correlated gene pairs within each cell type, which we then used to build cell type-specific  
131 networks (**Figure S2 and S3, Table S1**). Among these 2,368 genes, we identified 600,888 co-  
132 expressed gene pairs (21.4% of all possible pairs) that occurred in at least one of the 33 cell type-  
133 specific networks.

134

### 135 **Co-expression networks in fly brain cell types are highly context-dependent**

136 A network is made up of nodes connected by edges. Here, each node is a gene, and an edge  
137 between two nodes exists if the genes are significantly correlated with each other across cells  
138 within a specific cell type. If a core cellular network exists, we expect edges comprising this core

139 to be present in all cell types. We define the number of cell types in which each edge (i.e., each  
140 co-expressed gene pair) is detected as that edge's 'commonality'. The distribution of commonality  
141 scores exhibited a monotonic decline over most of the range, with more than 75% of the edges  
142 specific to one cell type and only 0.5% of edges common to more than 10 cell types (**Figure 2**).  
143 The largest observed commonality score was 29, and was observed for only one edge. The  
144 frequency of edge commonality initially decreased rapidly. However, this trend attenuated at  
145 approximately an edge commonality of 10. The frequency of commonality stayed at a roughly  
146 constant level until 22, before it finally dropped to 0 above 29 (**Figure 2**). That is, among the 33  
147 cell types we examined, no gene pairs were co-expressed in 30 or more cell types.

148 As a complement to the observed edge commonality distribution, we also plotted the gene  
149 commonality distribution, where gene commonality indicates the number of cell types in which a  
150 given gene was found to be significantly co-expressed with at least one other gene (i.e., to have at  
151 least one edge). The gene commonality distribution showed that most genes had one or more edges  
152 in the majority of cell types, and 176 genes had at least one edge in all 33 cell types (**Figure 2**).  
153 Thus, commonly expressed genes are frequently utilized and wired into co-expression circuits,  
154 though the specific wiring varies among different cell types.

155

## 156 **Recurrently co-expressed genes in multiple cell types**

157 We next asked to what extent the observed decline in edge commonality distribution with  
158 increasing cell types (**Figure 2**) differed from the null expectation. The null hypothesis provides  
159 the expected distribution of edge commonality when genes in each cell type are randomly co-  
160 expressed with each other, and we evaluate this in two ways. First, we derived a mathematical



161 expectation for the probabilities of edge commonality using the binomial distribution (**Methods**).  
162 For a gene pair to be co-expressed in 0, 1 or 2 cell types, the probability values were 0.7177, 0.2392  
163 or 0.0387, respectively, indicating most gene pairs would be expected to co-express in no cells, or  
164 only in one or two cell types. Given the 2,368 commonly expressed genes, we would expect to  
165 find 791,068 unique gene pairs to occur (**Methods**). Our observation of only 600,888 such gene  
166 pairs suggests that some genes recurrently co-express in multiple cell types. A full comparison of  
167 this analytically predicted distribution and the observed edge commonality showed that the two  
168 distributions agreed well at lower, more cell-specific commonality, but the discrepancy became  
169 obvious for gene pairs found in >3 cell types (**Figure S4**). Second, we compared the deviation  
170 between the observed edge commonality distribution and a null distribution using network  
171 randomization (**Methods**). This comparison showed that the observed distribution was enriched  
172 in high commonality edges. For instance, none of the randomizations generated an edge  
173 commonality larger than 15, while the observed distribution included hundreds of edges with  
174 commonality  $\geq 15$  (**Figure 3**). This pattern is robust to the percentile cutoff values used in network  
175 construction. When we applied a more stringent percentile cutoff and compared the observed with  
176 null distributions, the discrepancy became even more prominent, shown as the increasing distance  
177 between the two distributions measured using the Jensen–Shannon divergence (**Figure S5**). These  
178 results suggest that there exists a set of co-varying genes that occur more repeatedly than expected  
179 by chance across diverse cellular contexts.

180 In sum, despite the very large number of cell type-specific gene co-expression edges, our  
181 analysis points to a core cellular network composed of genes that are co-expressed irrespective of  
182 cellular contexts.

183

## 184 **Topology pinpoints a core cellular network**

185 By definition, co-expressed genes with high commonality are more likely to contribute to a  
186 core cellular network. Although we searched for a core network shared by all cells, we did not  
187 observe any edges shared by all cell types. This discrepancy may be due to the percentile cutoff  
188 that we used in network construction. Indeed, networks based on a less stringent cutoff value of  
189 the top 10% of expressed genes contained edges common to all cell types, and the enrichment of  
190 high commonality edges remained (**Figure S5**). Less stringent cutoffs come with a higher risk of  
191 false positive co-expression edges, as indicated by the presence of high-commonality edges in the  
192 randomized networks at low stringency (**Figure S5**). Therefore, we continued our analysis with  
193 only the top 1% of edges, and leveraged other information to identify co-expressed genes that  
194 might reside in a core cellular network.

195 Previous network studies suggest that shared edges tend to be tightly connected with each other  
196 (Huttlin et al. 2021). We first evaluated the neighborhood density of high commonality edges and  
197 then measured the clustering coefficients of networks at different edge commonality cutoffs to  
198 determine an informative commonality cutoff value. We combined all cell type-specific networks  
199 into a pan-network whose edge weights reflected edge commonality and explored the relationship  
200 between edge commonality and edge clustering coefficient (**Methods**). To aid in comparison, we  
201 subsampled 10,000 edges for edge groups that contained >10,000 edges to make them more  
202 comparable to edge groups with <10,000 edges. The result showed that edge commonality and  
203 edge clustering coefficient were positively correlated (**Figure 4A**), supporting the idea that  
204 recurrently co-expressed genes tend to reside in dense subnetwork neighborhoods.

205       Next, we progressively extracted edges with increasing commonality cutoffs and calculated  
206 each resulting subnetwork's clustering coefficient. The result showed that with cutoff values of  
207 increasing stringency, the clustering coefficient increased to a peak of 0.75 at a cutoff value of 14,  
208 declining thereafter (**Figure 4B**). Based on this result, we chose a commonality of 14 as the  
209 minimum value for including an edge in a core cellular network, which gave 1810 non-redundant  
210 edges among 179 genes (**Figure 4C**).

211       To evaluate the connectivity of the core network, we calculated its clustering coefficient and  
212 compared it to an ensemble of coefficients from pseudo core networks each with the same number  
213 of genes, edges, and degree distribution as the observed one. The mean simulated clustering  
214 coefficient value was 0.15, with a range of 0.12 to 0.18, much smaller than the observed value 0.75  
215 (**Figure S6**).

216       We noticed that edges in the defined core network were not present in every surveyed cell type.  
217 This could be due to our parameter value choices, such as correlation percentile cutoff or edge  
218 commonality cutoff, or alternatively, these edges or gene pairs are not co-expressed in all cell types.  
219 To examine these possibilities in detail, we looked at the rank of these edges' correlation among  
220 the distribution of edge correlation values in cell types in which they were below the top 1%. In  
221 particular, did they show consistently high ranked correlations across these remaining cell types?  
222 To quantify patterns over cell types, we used a rank aggregation method and estimated a P value  
223 per edge (**Method**). The estimated P value ranges from 0 to 1 and serves as an upper bound of the  
224 computationally expensive exact P value, with a small value indicating one edge is ranked  
225 consistently higher across cell types and a larger value meaning one edge's rank distribution over  
226 cell types follows a random pattern. Due to computational limitations, we randomly sampled 100  
227 edges in 10 edge commonality groups separately and computed their respective P values (**Figure**

228 S7). More than 94 percent of edges sampled from the core network (edge commonality  $\geq 14$ ) are  
229 highly ranked in the remaining cell types ( $P < 0.05$ ), whereas none of the 100 cell type-specific  
230 edges (edge commonality=1) that were tested were significant ( $P > 0.05$  in all cases), suggesting  
231 that although these core edges did not make to the top 1% correlations in a set of cell types, they  
232 are relatively highly co-expressed across the remaining cell types.

233

### 234 **Structure, function and evolutionary signatures of the core cellular network**

235 Having defined a core cellular network, we next examined its structure, functional enrichment  
236 and evolutionary signature. Many complex networks can be divided into modules, where genes  
237 are more highly interconnected within modules than between modules (Newman 2003). Modules  
238 identified from gene co-expression networks tend to take part in the same biological processes or  
239 pathways (Ruprecht, Proost, et al. 2017; Wolfe, Kohane, and Butte 2005). To explore the structural  
240 and functional organization of this core, we decomposed it into highly connected modules using  
241 the Markov Clustering Algorithm (**Methods**). In total, we identified seven modules with at least  
242 five gene members (**Figure 5 and Table S2**). We then annotated each module's biological function  
243 through Gene Ontology (GO) enrichment analysis. The results revealed an array of 'housekeeping'  
244 and brain related functions enriched within different modules (**Figure 5 and Table S3**). The largest  
245 module (module 7) contained 78 genes, and was enriched for ribosome related functions, such as  
246 cytoplasmic translation, suggesting tight correlation of genes encoding ribosomal proteins across  
247 cells. The second largest module (module 6), contained 15 genes and was enriched for glycolysis,  
248 a process central to cellular energy homeostasis. Modules 1 and 2 appeared to facilitate ATP  
249 metabolic process and proton transport, and module 3 was related to synaptic signaling, perhaps

250 reflecting neuronal functions. Module 5 formed a fully interconnected subnetwork without any  
251 edges from outside, and its gene members were heat-shock proteins (HSP) or co-chaperones, key  
252 players in protein folding. The smallest of the modules, module 4, showed enrichment in the  
253 rhodopsin biosynthetic process.

254 To characterize the evolutionary signature of each module, we used phylostratigraphy,  
255 assigning each gene in each module to one of 10 different evolutionary time periods (**Table S4**).  
256 Broadly speaking, genes involved in the core network were enriched for genes with ancient origins,  
257 compared with genes commonly expressed in the fly brain (**Figure 6A**). Looking in detail,  
258 different modules had different gene age compositions (**Figure 6B**). Gene members of the  
259 ribosomal (module 7) and protein folding (module 5) modules predated the divergence of the  
260 eukaryota, while those of the ATP metabolic (module 1 and 2), glycolysis (module 6) and synaptic  
261 signaling (module 3) modules included genes distributed across both ancient and relatively recent  
262 evolutionary time periods. Module 4 showed the youngest age signature, with all gene members  
263 emerging after eumetazoa. These diverse age signatures of different core modules suggest that  
264 they arose by integration of both young and old genes, perhaps involving step-wise recruitment of  
265 young genes into ancestral core modules.

266

## 267 **Discussion**

268 To what extent do all cells in an organism rely on a common core of interacting genes? To  
269 investigate this question, we examined cell type-specific gene co-expression networks using fly  
270 brain scRNA-seq data. We described a core gene co-expression network and found it to be small  
271 and more densely connected relative to the larger, more cell-specific gene co-expression networks.

272 The core is composed of numerous co-expression modules that appear distinct from each other in  
273 terms of functional enrichment and the distribution of gene age.

274 Our study is distinct in at least three ways from previous work interrogating core networks.  
275 First, a large body of studies has relied heavily on protein interactions to derive biological networks  
276 and find commonalities. While these studies are informative, they suffer from the bias that protein  
277 interaction data are enriched for highly-studied proteins, which may lead to an incomplete picture  
278 of network structure (Skinnider, Stacey, and Foster 2018; Gillis, Ballouz, and Pavlidis 2014;  
279 Schaefer, Serrano, and Andrade-Navarro 2015). Moreover, these studies are typically lacking  
280 information on the cell specificity of such interactions. In our study, we analyzed transcriptome  
281 data, which interrogate almost all genes in the genome and are less biased with respect to  
282 knowledge from prior databases or existing literature.

283 Second, instead of relying on expression levels of individual genes to identify genes common  
284 across cell types, we examined covariation between genes as the measure of functional  
285 commonality, which provides not only a stricter criterion to infer gene function (Hughes et al.  
286 2000), but also likely captures conserved gene regulatory networks (Yu et al. 2003; Stuart et al.  
287 2003; Segal et al. 2003).

288 Third, we identified covarying gene pairs using scRNA-seq data, which unlike bulk tissue data,  
289 can be defined by cell type, even within a single biological sample. In contrast to bulk  
290 transcriptomic analysis and PPI data, where the cellular specificity of each interaction is largely  
291 ambiguous, scRNA-seq enabled us to build cell type-specific networks at a resolution that has  
292 hitherto not been possible.

293

294 **Is there a core network active in all cells?**

295 To determine whether there is a core network common to all cells at the level of single-cell gene-  
296 gene covariation, we focused our analysis on genes that were expressed across all cell types, which  
297 allowed us to directly compare the diverse co-expression patterns among a common set of genes.  
298 We limit the question to the fly brain, acknowledging that the core modules we identify might be  
299 absent in non-brain cells. Even among the genes expressed in all cell types, we found that the co-  
300 expression of most genes was cell type-specific, and yet there also existed a significantly large  
301 number of genes whose co-expression occurred among multiple cell types. This enrichment of  
302 shared co-expressed genes suggests the existence of a core co-expression network across diverse  
303 cell types. We applied a relatively high statistical significance threshold to extract shared co-  
304 expressed genes, which we defined as the core network.

305 While we identified edges common to many cell types, our inferred core cellular network lacks  
306 edges shared by all cell types. We consider two alternative explanations for this observation. First,  
307 it is possible that a common core co-expression network for all brain cells does not exist, and that  
308 cell co-expression networks are so diverse as to lack such rigid network structure across the cells  
309 of the *Drosophila* brain. Alternatively, we considered the possibility that a core does exist, but that  
310 the statistical inference of gene co-expression and the threshold value we use to build the network  
311 might not fully resolve the core in all cells. To define the core, we specify multiple parameters,  
312 including a gene correlation metric, a correlation threshold to select co-expressed genes, and an  
313 edge commonality cutoff to extract a core network. Given that our definition of gene interactions  
314 is based on statistical inference of correlations, we might simply fail to observe a real interaction  
315 in one or more cell types due to type II error (false negatives). As we explored this parameter space,  
316 moving from relaxed to stringent parameter values, a few features of the network became apparent.

317 In particular, more relaxed parameter values revealed co-expressed gene pairs observed in all cell  
318 types in the brain, but this inherently increased the risk of false positive gene pairs (type I error),  
319 as revealed by network permutation. In an effort to reduce the risk of false positives, we examined  
320 a more conservative parameter space, which still yielded many edges shared widely across cell  
321 types, but did not identify edges shared by all cells. We looked in detail at those edges that were  
322 in our defined core cellular network, with edges present in  $\geq 14$  cell types, and yet were absent  
323 from the top 1% of most significantly correlated gene pairs in the remaining cell types. We found  
324 that almost all of these edges were in fact ranked among the most highly co-expressed, but below  
325 the initial threshold, in the remaining cell types. Thus, their absence from the core appeared to be  
326 due to their relatively weak co-expression strengths compared to the cell type-specific gene pairs.  
327 Together, our analysis indicates the existence of a core cellular network, though the size and  
328 composition that we define is conditional on parameter choices.

329

### 330 **Topological properties of the core network**

331 With our current parameter choices, the defined core network is remarkably small when  
332 compared to the much larger network of cell-specific interactions. In particular, only 0.5% of co-  
333 expressed gene pairs are shared by  $\geq 10$  cell types in the fly brain. This number is at the lower end  
334 compared with previous studies of different biological networks. For example, Skinnider et al.  
335 (2021) constructed tissue-specific PPI networks for seven mouse tissues and found 0.7% of all  
336 detected PPIs were shared by all tissues. Neph et al. (2012) built TF interaction networks for 41  
337 cell types in humans and found that five percent of interacting TFs were common to all cell types.  
338 Almass et al. (2005) used flux-balance analysis to study active metabolic reactions of *Escherichia*



339 *coli* in 30,000 diverse simulated environments and found 90 of 758 (11.9%) reactions were always  
340 active.

341 What are the factors that contribute to the size of a core network? From a statistical perspective,  
342 the number of co-expressed genes change along with parameter choices, which in turn modify the  
343 observed core network size. From a biological perspective, different biological contexts, such as  
344 organ, sex, genotype and age, might have condition-specific co-expressed gene pairs, which would  
345 affect the core network edge compositions and hence its size. Our defined core network was  
346 discovered using fly brains, a complex organ with highly heterogeneous cell type composition.  
347 Projecting such an analysis to more organs, or even to a whole fly, would very likely reveal an  
348 even smaller core, as the inclusion of a larger set of diverse cells would lead to a smaller set of  
349 universal edges. Furthermore, some of the modules that we find in the core we describe here appear  
350 to be related to the brain in particular, and so it seems reasonable to presume that those modules  
351 would not be found in an analysis that includes more organs or tissues. We therefore speculate that  
352 the relative core size of 0.5% that we observe is an overestimate of the true core network size for  
353 all cells found in *Drosophila melanogaster*. While the 1810 edges and 179 genes in the core might  
354 decrease in an organism-wide analysis, we postulate that such an analysis could ultimately identify  
355 modules with a low but constant number of co-expressed genes due to the presence of a small core  
356 network common to all cells in an individual.

357 Another prominent feature of this core network is its dense connectivity. The gene network  
358 architecture we observed, which embodies extensive cell-type specific interactions along with a  
359 shared and densely connected core, echoes findings from other types of biological networks. For  
360 example, Liu et al. (2020) identified 13,764 PPIs in yeast across nine environments and found that  
361 60% of PPIs were found in only one environment. They also show that PPIs, present in  $\geq 8$

362 environments, form 'tight' modules of high node degree, while PPIs in  $\leq 3$  environments form less-  
363 connected modules of smaller node degree (Liu et al. 2020). Protein interaction networks based on  
364 just two human cell lines revealed that shared interactions tend to reside in dense subnetworks and  
365 correspond to known protein complexes such as the exosome and the COP9 signalosome (Huttlin  
366 et al. 2021). Similarly, network analyses of gene co-expression from bulk transcriptomics in  
367 *Arabidopsis* and humans suggest a highly connected core, which appears alongside an extensive  
368 number of condition-specific gene interactions (He and Maslov 2016; Lee et al. 2004). Taken  
369 together, these results suggest a universal organizing principle in biological systems, where widely  
370 shared components of interaction networks are relatively small and densely connected (Milo et al.  
371 2004; 2002; Csermely et al. 2013).

372

### 373 **An evolutionary perspective of the multi-part core network**

374 Previous work suggests that biological systems evolve and function in a modular fashion,  
375 where groups of genes that share functional relationships tend to co-evolve independently of genes  
376 in other functional groups, and where genes and proteins that share function tend to be co-regulated  
377 (Hartwell et al. 1999; Schlosser and Wagner 2004; Ryan et al. 2012; Ge et al. 2001; Martin and  
378 Fraser 2018). Consistent with this, we find the core network is modularly structured. Modules  
379 within the core network have different evolutionary signatures and enrich different biological  
380 functions. In our analysis of the age distributions of module gene members, we found some  
381 modules with genes of ancient origin, and others with a mixture of ancient and young genes, and  
382 at least one having a surprisingly young signature.

383 It is obviously of great interest to determine the origination time and evolutionary dynamics of  
384 the core network modules. As a first step, we dissected the module gene members into  
385 phylostratographic age groups. However, this gene age information is not sufficient to infer  
386 module ages, as the mere presence of two ancient genes is not equivalent to ancient co-expression,  
387 genes can be co-opted to generate new functions by changing their patterns of regulation (Ruprecht,  
388 Vaid, et al. 2017; Thompson, Regev, and Roy 2015). To better estimate the evolutionary origin of  
389 each module, we would need to apply a phylogenetic analysis of gene co-expression, and thus  
390 module dynamics, across multiple species. Given the focus here on a single species, we cannot  
391 infer the degree of evolutionary conservation of the co-expression relationships themselves, and  
392 so we cannot determine if the network modules we describe are themselves of different ages. That  
393 said, there is still some evolutionary inference we can draw based on the evolutionary ages of the  
394 genes within each module. Gene modules with a young age signature are only feasible after those  
395 young genes emerged. Thus, gene age sets an upper bound on module origination time. For  
396 example, the ages of genes in module 4 are distributed among ‘Bilateria’, ‘Protostomia’, and  
397 ‘Arthropoda’ evolutionary periods. The most recent of these groups, the Arthropoda, thus sets an  
398 upper bound on module age—it must have arisen sometime after the origin of arthropods.

399 Our observation of core modules with genes of different ages is in line with previous  
400 comparative studies based on bulk transcriptomics, which suggest that core modules may have  
401 evolved at different times (Pembroke, Hartl, and Geschwind 2021; Stuart et al. 2003). Our work  
402 however points toward a more limited core network, both in size and in function, than these studies.  
403 At the resolution afforded by bulk transcriptomic analysis, ancient co-expression modules  
404 preserved across species appear quite broad in function, including ribosome, proteasome, energy  
405 generation, cell cycle, secretion, transcription and translation functions (Stuart et al. 2003), while

406 less evolutionarily conserved modules are naturally involved in an even broader range of functions  
407 (Pembroke, Hartl, and Geschwind 2021; Stuart et al. 2003). We show however that even in a single  
408 species, the conserved core network is enriched in a smaller range of functions, and we argue that  
409 this is an overestimate of the core network that may be conserved across a whole organism, much  
410 less across species. Of the two modules that we describe that consist of evolutionarily ancient  
411 genes, one was functionally enriched for ribosome biogenesis and the other for protein folding.  
412 Due to the gene-age distribution of these modules relative to the others we identify, we speculate  
413 that these two modules are most likely to be conserved across the widest range of cells and of  
414 species. The ‘hybrid’ modules, containing both young and old genes, enrich ATP metabolic  
415 processes, oxidative phosphorylation, glycolysis, and chemical synaptic transmission. This pattern  
416 points to these hybrid core modules being important for energy metabolism, perhaps in brain cells  
417 in particular, but regardless, we suspect that these modules would be less conserved across cells  
418 and species. To obtain a more complete understanding of the emergence, assembly and  
419 evolutionary dynamics of the core cellular network and its conserved functions, future studies  
420 should focus on obtaining single cell data from more tissues and from multiple species.

421

## 422 **Limitation and future directions**

423 In this study, we sought a core of interacting genes found across cell types in the fly brain.  
424 While the work described here benefits from access to high quality single-cell transcriptome data,  
425 there are still several caveats worth noting. First, the fly brain cell atlas (Davie et al. 2018) was  
426 generated using a mixture of two genotypes, and with cells from both female and male fly brains  
427 and from individuals of several ages. Thus, genotype, sex or age-specific gene co-expression

428 patterns are hidden. Future studies targeting individual genotypes, separate sexes, and/or specific  
429 age groups might identify core networks that differ by age, sex or genotype. Second, we inferred  
430 co-expressed gene pairs from gene expression data statistically. Gene co-expression is not  
431 equivalent to gene co-regulation, which may be more indicative of functional relationships. Further  
432 experimental work is needed to validate the functional implications of these gene pairs. Lastly, we  
433 note that this analysis is based on scRNA-seq data, rather than single nuclear RNA-seq. These two  
434 approaches might capture different aspects of cell activity (H. Wu et al. 2019; Denisenko et al.  
435 2020; Thrupp et al. 2020).

436 To fully understand the molecular basis of cell functions, we need to integrate biological  
437 networks from different domains—e.g., transcriptome, proteome, or metabolome. It would be of  
438 considerable interest to compare core networks defined for each domain and to study their  
439 relationships. For example, it has been shown that genes whose protein products physically interact  
440 tend to be co-expressed together, suggesting an interdependence of network structure between  
441 biological domains (Fraser et al. 2004; Ge et al. 2001; Lemos, Meiklejohn, and Hartl 2004). A  
442 number of challenges exist however, such as how to define core networks for different types of  
443 data, and how to relate networks between domains (Civelek and Lusis 2014; Mitra et al. 2013).  
444 Future studies addressing these challenges may identify a systematic approach to comprehensively  
445 survey and compare core networks in different domains. Such an analysis could elucidate the  
446 organizing principles of cellular networks and provide deeper insight into the evolutionary origin  
447 and molecular functions shared by all cells.

448

## 449 **Conclusions**

450 In summary, we leveraged single cell transcriptome data to reveal a core cellular network in fly  
451 brains, and deciphered its topological, structural, functional, and evolutionary properties. Our  
452 study demonstrates that studying single cell data through a network approach can provide novel  
453 insights into understanding cellular functions in a complex organ. It would be valuable to apply  
454 our analysis to similar data from different organs, and in multiple species, to reveal the most  
455 conserved network components, and the core networks that exist in cells of all multicellular  
456 organisms.

457

## 458 **Materials and Methods**

### 459 **Dataset collection and preprocessing**

460 We downloaded the fly brain atlas data from NCBI Gene Expression Omnibus with GEO  
461 accession ‘GSE107451’. The original dataset contains 17,473 gene expression data in 56,902 high-  
462 quality brain cells grouped into 115 cell clusters. As a quality control step, we first removed 668  
463 cells in a cell cluster named ‘Hsp’ as they represent stressed cells (Jasper Janssens, personal  
464 communication). We then removed cells that had either less than 200 expressed genes, less than  
465 500 total unique molecular identifier counts, or a total fraction of mitochondrial gene expression  
466 exceeding 30%. These criteria led to the removal of another 42 cells, leaving 56,192 cells. These  
467 cells were annotated to 115 cell clusters (Davie et al. 2018). We selected 33 cell clusters which  
468 had at least 200 cells and were annotated to known brain cell types in the following analyses  
469 **(Figure S1)**.

470 We filtered genes for each cell type individually by removing genes that were expressed in less  
471 than 15 cells, or in fewer than 0.5% of cells in that cell type. This gene filtering procedure led to  
472 8013 genes as expressed in at least one cell type, 2368 of which were commonly expressed in all  
473 33 cell types (**Figure S1**).

474

### 475 **Constructing cell type-specific gene co-expression networks**

476 We used the bigScale2 algorithm (Iacono, Massoni-Badosa, and Heyn 2019) to compute a  
477 gene-gene correlation matrix for each cell type (**Figure S2**). This algorithm was tailored to mitigate  
478 the impact of sparse counts at the single-cell level. It first groups cells into homogenous cell  
479 clusters, then performs differential expression (DE) analysis between all pairs of clusters. With N  
480 clusters, we obtain  $N*(N-1)/2$  unique comparisons and each comparison generates one Z-score for  
481 each gene, indicating the likelihood of an expression change between the corresponding two  
482 clusters. Finally, bigScale2 uses transformed Z-scores instead of original expression values to  
483 calculate Pearson correlation coefficients (**Figures S3**). For each cell type, we ranked gene pairs  
484 by their absolute correlation values and placed the top 1% of correlated gene pairs into a co-  
485 expression network, with the corresponding absolute correlation values ranging from 0.53 to 0.93.  
486 Network summary statistics, including major component size, average path length, and clustering  
487 coefficient were calculated using functions from the R package iGraph (Csardi and Nepusz 2006)  
488 (**Table S1**).

489

## 490 **Computing gene and edge commonality distributions**

491 To evaluate commonality and specificity across cell type-specific networks, we plot the node  
492 and edge commonality distributions. The commonality of a node (gene) refers to the number of  
493 cell types in which this gene was found to be co-expressed (edge) with at least one other gene. The  
494 commonality of an edge linking a given pair of genes refers to the number of cell types in which  
495 this edge is detected.

496

## 497 **A mathematical approximation of the edge commonality distribution**

498 We derived a mathematical approximation for the probability of a gene pair to be co-expressed  
499 in a given number of cell types. As we focused on 2,368 commonly expressed genes and selected  
500 the top 1% highly correlated genes in each cell type, a gene pair has a probability of 0.01 as being  
501 co-expressed in any one cell type. Examining 33 cell types and using the binomial distribution, the  
502 probability  $P(k)$  of a gene pair co-expressed in  $k$  cell types equal

$$503 \quad P(k) = C(33, k) * 0.01^k * (1 - 0.01)^{33-k}$$

504 with the first term representing the combinatorial number describing the number of ways of  
505 picking  $k$  items from a pool of 33 cell types. Following this equation, the probability of a gene pair  
506 not co-expressed in any cell type is 0.7177 at  $k = 0$ . Given the 2,368 commonly expressed genes,  
507  $C(2358, 2) * (1 - 0.7177) = 791,068$  non-redundant gene pairs were expected to co-express in at  
508 least one cell type.

509



## 510 **Network randomization**

511 To obtain a null distribution for edge commonality distributions, we used a network  
512 randomization approach. We randomized the edges in each cell type-specific network individually  
513 keeping the gene connectivities fixed using the rewire function in iGraph. A set of randomizations  
514 for all 33 cell types resulted in one pseudo edge commonality distribution. We performed the  
515 randomization procedure 100 times and used the ensemble of the 100 pseudo edge commonality  
516 distributions as the null distribution. We computed the null distribution with different percentile  
517 cutoff values and used Jensen–Shannon divergence with the JSD function from the R package  
518 Philentropy (Drost 2018) to measure the distance between two distributions.

519

## 520 **Calculation of clustering coefficient per edge**

521 To determine the topological properties of edges with different levels of commonality, we  
522 calculated a clustering coefficient for each edge following the approach in Huttlin et al. 2021. We  
523 combined all cell type-specific networks into a pan-network whose edge weights reflected edge  
524 commonality. For each edge in the pan-network, we extracted all first-degree neighbors of the two  
525 genes constituting this edge. These neighbors and the two focal genes defined a subgraph from the  
526 whole pan-network. For each subgraph, we calculated the clustering coefficient as the number of  
527 triangles (3 vertices with three edges) divided by the number of connected triples (3 vertices with  
528 two edges). As the clustering coefficient of a graph is related to its connectivity, or edge density,  
529 a high local clustering coefficient indicates that this edge is located in a dense subnetwork.

530

## 531 **Rank aggregation analysis**

532 Each gene pair or edge has a rank based on its absolute correlation value in a given cell type.  
533 To quantify if one edge is ranked consistently higher across a set of cell types based on its absolute  
534 correlation value, we used the aggregateRanks function from the R package RobustRankAggreg  
535 (Kolde et al. 2012). This function is based on a probabilistic model of order statistics and computes  
536 a derived P value for each edge. The derived P value ranges from 0 to 1 and serves as an upper  
537 bound of the computationally expensive exact P value, with a small value indicating one edge is  
538 ranked consistently higher across cell types and a larger value meaning one edge's rank  
539 distribution over cell types follows a random pattern. We chose 10 edge commonality groups: 1,  
540 4, 8, 10, 12, 14, 16, 18, 20, and 22. Within each edge commonality group, we randomly sampled  
541 100 edges. For each edge, we first collected the cell types that this edge was absent (didn't make  
542 to the top 0.1% correlations), and then calculated the derived P values on these cell types. The  
543 derived P values were corrected for multiple testing using the p.adjust function in R with the  
544 Benjamini-Hochberg method, referred to as adjusted P values hereafter. We plotted the adjusted P  
545 value distribution of the 100 sampled edges for each edge commonality group separately.

546

## 547 **Module decomposition and functional annotation of the core**

548 To decompose the core cellular network into highly connected modules, we used the mcl  
549 function from the R package MCL (Jäger 2015) which implements a Markov cluster algorithm to  
550 identify clusters in networks. After module detection, we performed Gene Ontology (GO)  
551 enrichment analysis of genes in each module using the R package clusterProfiler (T. Wu et al.  
552 2021) with a Bonferroni correction and an adjusted P value cutoff of 0.05. Significant GO terms

553 were identified and refined to reduce redundant GO terms via the simplify method from the  
554 clusterProfiler package.

555

## 556 **Assigning genes into evolutionary age groups**

557 We downloaded data from a previous study to assign genes into different evolutionary age  
558 groups using a phylostratigraphy framework (Domazet-Lošo et al. 2017). This framework allows  
559 us to date the evolutionary origination time of a gene by identifying its homologs across the tree  
560 of life. There were 13,794 genes assigned to 12 age groups in the original publication, 2,222 of  
561 which overlapped with the 2,368 expressed genes in this study, including 1,021 genes in the oldest  
562 age group “CellLife”, 707 in “Eukaryota”, 88 in “Opisthokonta”, 140 in “Metazoa”, 34 in  
563 “Eumetazoa”, 78 in “Bilateria”, 15 in “Protostomia”, 17 in “Arthropoda”, 16 in “Pancrustacea”,  
564 46 in “Insecta”, 48 in “Diptera” and 12 in the youngest age group “Drosophila”.

565

## 566 **Declarations**

## 567 **Ethics approval and consent to participate**

568 Not applicable

## 569 **Consent for publication**

570 Not applicable

571 **Availability of data and materials**

572 The fly brain atlas dataset analyzed during the current study is available at GEO with accession  
573 number GSE107451. R scripts for data analyses are available from the following GitHub  
574 repository: [https://github.com/mingwhy/fly.brain.core\\_coexpr.net](https://github.com/mingwhy/fly.brain.core_coexpr.net).

575 **Competing interests**

576 The authors declare that they have no competing interests.

577 **Funding**

578 This work was supported in part by National Institute on Aging grants R21AG56872901,  
579 R01AG057330, and R01AG063371.

580 **Authors' contributions**

581 MY and DP designed the study. MY collected and analyzed the data. MY, BH and DP interpreted  
582 the data and wrote the manuscript. All authors read and approved the final manuscript.

583 **Acknowledgements**

584 This work was in part facilitated through the use of advanced computational, storage, and  
585 networking infrastructure provided by the Hyak supercomputer system at the University of  
586 Washington.

587

## 588   **References**

- 589   Almaas, Eivind, Zoltán N Oltvai, and Albert-László Barabási. 2005. “The Activity Reaction  
590       Core and Plasticity of Metabolic Networks.” *PLoS Computational Biology* 1 (7): e68.
- 591   Barabasi, Albert-Laszlo, and Zoltan N Oltvai. 2004. “Network Biology: Understanding the  
592       Cell’s Functional Organization.” *Nature Reviews Genetics* 5 (2): 101–13.
- 593   Civelek, Mete, and Aldons J Lusic. 2014. “Systems Genetics Approaches to Understand  
594       Complex Traits.” *Nature Reviews Genetics* 15 (1): 34–48.
- 595   Csardi, Gabor, and Tamas Nepusz. 2006. “The Igraph Software Package for Complex Network  
596       Research.” *InterJournal, Complex Systems* 1695 (5): 1–9.
- 597   Csermely, Peter, András London, Ling-Yun Wu, and Brian Uzzi. 2013. “Structure and Dynamics  
598       of Core/Periphery Networks.” *Journal of Complex Networks* 1 (2): 93–123.
- 599   Davie, Kristofer, Jasper Janssens, Duygu Koldere, Maxime De Waegeneer, Uli Pech, Łukasz  
600       Kreft, Sara Aibar, Samira Makhzami, Valerie Christiaens, and Carmen Bravo González-  
601       Blas. 2018. “A Single-Cell Transcriptome Atlas of the Aging Drosophila Brain.” *Cell* 174  
602       (4): 982–98.
- 603   Denisenko, Elena, Belinda B Guo, Matthew Jones, Rui Hou, Leanne De Kock, Timo Lassmann,  
604       Daniel Poppe, Olivier Clément, Rebecca K Simmons, and Ryan Lister. 2020. “Systematic  
605       Assessment of Tissue Dissociation and Storage Biases in Single-Cell and Single-Nucleus  
606       RNA-Seq Workflows.” *Genome Biology* 21: 1–25.
- 607   Domazet-Lošo, Tomislav, Anne-Ruxandra Carvunis, Mar Albà, Martin Sebastijan Šestak, Robert  
608       Bakarić, Rafik Neme, and Diethard Tautz. 2017. “No Evidence for Phylostratigraphic Bias  
609       Impacting Inferences on Patterns of Gene Emergence and Evolution.” *Molecular Biology  
610       and Evolution* 34 (4): 843–56.
- 611   Drost, Hajk-Georg. 2018. “Philentropy: Information Theory and Distance Quantification with  
612       R.” *Journal of Open Source Software* 3 (26): 765.
- 613   Eisenberg, Eli, and Erez Y Levanon. 2013. “Human Housekeeping Genes, Revisited.” *Trends in  
614       Genetics* 29 (10): 569–74.
- 615   Farahbod, Marjan, and Paul Pavlidis. 2020. “Untangling the Effects of Cellular Composition on  
616       Coexpression Analysis.” *Genome Research* 30 (6): 849–59.
- 617   Fraser, Hunter B, Aaron E Hirsh, Dennis P Wall, and Michael B Eisen. 2004. “Coevolution of  
618       Gene Expression among Interacting Proteins.” *Proceedings of the National Academy of  
619       Sciences* 101 (24): 9033–38.

- 620 Ge, Hui, Zhihua Liu, George M Church, and Marc Vidal. 2001. “Correlation between  
621 Transcriptome and Interactome Mapping Data from *Saccharomyces Cerevisiae*.” *Nature*  
622 *Genetics* 29 (4): 482–86.
- 623 Ghadie, Mohamed A, Jasmin Coulombe-Huntington, and Yu Xia. 2018. “Interactome Evolution:  
624 Insights from Genome-Wide Analyses of Protein–Protein Interactions.” *Current Opinion in*  
625 *Structural Biology* 50: 42–48.
- 626 Gillis, Jesse, Sara Ballouz, and Paul Pavlidis. 2014. “Bias Tradeoffs in the Creation and Analysis  
627 of Protein–Protein Interaction Networks.” *Journal of Proteomics* 100: 44–54.
- 628 Greene, Casey S, Arjun Krishnan, Aaron K Wong, Emanuela Ricciotti, Rene A Zelaya, Daniel S  
629 Himmelstein, Ran Zhang, Boris M Hartmann, Elena Zaslavsky, and Stuart C Sealfon. 2015.  
630 “Understanding Multicellular Function and Disease with Human Tissue-Specific  
631 Networks.” *Nature Genetics* 47 (6): 569–76.
- 632 Harris, Benjamin D, Megan Crow, Stephan Fischer, and Jesse Gillis. 2021. “Single-Cell Co-  
633 Expression Analysis Reveals That Transcriptional Modules Are Shared across Cell Types in  
634 the Brain.” *Cell Systems*.
- 635 Hart, Yuval, and Uri Alon. 2013. “The Utility of Paradoxical Components in Biological  
636 Circuits.” *Molecular Cell* 49 (2): 213–21.
- 637 Hartwell, Leland H, John J Hopfield, Stanislas Leibler, and Andrew W Murray. 1999. “From  
638 Molecular to Modular Cell Biology.” *Nature* 402 (6761): C47–52.
- 639 He, Fei, and Sergei Maslov. 2016. “Pan-and Core-Network Analysis of Co-Expression Genes in  
640 a Model Plant.” *Scientific Reports* 6 (1): 1–11.
- 641 Hughes, Timothy R, Matthew J Marton, Allan R Jones, Christopher J Roberts, Roland  
642 Stoughton, Christopher D Armour, Holly A Bennett, Ernest Coffey, Hongyue Dai, and  
643 Yudong D He. 2000. “Functional Discovery via a Compendium of Expression Profiles.”  
644 *Cell* 102 (1): 109–26.
- 645 Huttlin, Edward L, Raphael J Bruckner, Jose Navarrete-Perea, Joe R Cannon, Kurt Baltier, Fana  
646 Gebreab, Melanie P Gygi, Alexandra Thornock, Gabriela Zarraga, and Stanley Tam. 2021.  
647 “Dual Proteome-Scale Networks Reveal Cell-Specific Remodeling of the Human  
648 Interactome.” *Cell* 184 (11): 3022–40.
- 649 Iacono, Giovanni, Ramon Massoni-Badosa, and Holger Heyn. 2019. “Single-Cell  
650 Transcriptomics Unveils Gene Regulatory Network Plasticity.” *Genome Biology* 20 (1): 1–  
651 20.
- 652 Jäger, Martin L. 2015. “MCL: Markov Cluster Algorithm. R Package Version 1.0.”  
653 [Https://CRAN.R-Project.Org/Package=MCL](https://CRAN.R-Project.Org/Package=MCL).
- 654 Kolde, Raivo, Sven Laur, Priit Adler, and Jaak Vilo. 2012. “Robust Rank Aggregation for Gene  
655 List Integration and Meta-Analysis.” *Bioinformatics* 28 (4): 573–80.

- 656 Lee, Homin K, Amy K Hsu, Jon Sajdak, Jie Qin, and Paul Pavlidis. 2004. “Coexpression  
657 Analysis of Human Genes across Many Microarray Data Sets.” *Genome Research* 14 (6):  
658 1085–94.
- 659 Lehner, Ben, and Andrew G Fraser. 2004. “Protein Domains Enriched in Mammalian Tissue-  
660 Specific or Widely Expressed Genes.” *Trends in Genetics* 20 (10): 468–72.
- 661 Lemos, Bernardo, Colin D Meiklejohn, and Daniel L Hartl. 2004. “Regulatory Evolution across  
662 the Protein Interaction Network.” *Nature Genetics* 36 (10): 1059–60.
- 663 Lim, Wendell A, Connie M Lee, and Chao Tang. 2013. “Design Principles of Regulatory  
664 Networks: Searching for the Molecular Algorithms of the Cell.” *Molecular Cell* 49 (2):  
665 202–12.
- 666 Liu, Zhimin, Darach Miller, Fangfei Li, Xianan Liu, and Sasha F Levy. 2020. “A Large  
667 Accessory Protein Interactome Is Rewired across Environments.” *Elife* 9: e62365.
- 668 Martin, Trevor, and Hunter B Fraser. 2018. “Comparative Expression Profiling Reveals  
669 Widespread Coordinated Evolution of Gene Expression across Eukaryotes.” *Nature*  
670 *Communications* 9 (1): 1–9.
- 671 Milo, Ron, Shalev Itzkovitz, Nadav Kashtan, Reuven Levitt, Shai Shen-Orr, Inbal Ayzenshtat,  
672 Michal Sheffer, and Uri Alon. 2004. “Superfamilies of Evolved and Designed Networks.”  
673 *Science* 303 (5663): 1538–42.
- 674 Milo, Ron, Shai Shen-Orr, Shalev Itzkovitz, Nadav Kashtan, Dmitri Chklovskii, and Uri Alon.  
675 2002. “Network Motifs: Simple Building Blocks of Complex Networks.” *Science* 298  
676 (5594): 824–27.
- 677 Mitra, Koyel, Anne-Ruxandra Carvunis, Sanath Kumar Ramesh, and Trey Ideker. 2013.  
678 “Integrative Approaches for Finding Modular Structure in Biological Networks.” *Nature*  
679 *Reviews Genetics* 14 (10): 719–32.
- 680 Neph, Shane, Andrew B Stergachis, Alex Reynolds, Richard Sandstrom, Elhanan Borenstein,  
681 and John A Stamatoyannopoulos. 2012. “Circuitry and Dynamics of Human Transcription  
682 Factor Regulatory Networks.” *Cell* 150 (6): 1274–86.
- 683 Newman, Mark E J. 2003. “The Structure and Function of Complex Networks.” *SIAM Review* 45  
684 (2): 167–256.
- 685 Parfrey, Laura Wegener, and Daniel J G Lahr. 2013. “Multicellularity Arose Several Times in  
686 the Evolution of Eukaryotes (Response to DOI 10.1002/Bies. 201100187).” *Bioessays* 35  
687 (4): 339–47.
- 688 Pembroke, William G, Christopher L Hartl, and Daniel H Geschwind. 2021. “Evolutionary  
689 Conservation and Divergence of the Human Brain Transcriptome.” *Genome Biology* 22 (1):  
690 1–33.

- 691 Promislow, Daniel. 2005. “A Regulatory Network Analysis of Phenotypic Plasticity in Yeast.”  
692 *The American Naturalist* 165 (5): 515–23.
- 693 Proulx, Stephen R, Daniel E L Promislow, and Patrick C Phillips. 2005. “Network Thinking in  
694 Ecology and Evolution.” *Trends in Ecology & Evolution* 20 (6): 345–53.
- 695 Rancati, Giulia, Jason Moffat, Athanasios Typas, and Norman Pavelka. 2018. “Emerging and  
696 Evolving Concepts in Gene Essentiality.” *Nature Reviews Genetics* 19 (1): 34–49.
- 697 Ruprecht, Colin, Sebastian Proost, Marcela Hernandez-Coronado, Carlos Ortiz-Ramirez, Daniel  
698 Lang, Stefan A Rensing, Jörg D Becker, Klaas Vandepoele, and Marek Mutwil. 2017.  
699 “Phylogenomic Analysis of Gene Co-expression Networks Reveals the Evolution of  
700 Functional Modules.” *The Plant Journal* 90 (3): 447–65.
- 701 Ruprecht, Colin, Neha Vaid, Sebastian Proost, Staffan Persson, and Marek Mutwil. 2017.  
702 “Beyond Genomics: Studying Evolution with Gene Coexpression Networks.” *Trends in  
703 Plant Science* 22 (4): 298–307.
- 704 Ryan, Colm J, Assen Roguev, Kristin Patrick, Jiewei Xu, Harlizawati Jahari, Zongtian Tong,  
705 Pedro Beltrao, Michael Shales, Hong Qu, and Sean R Collins. 2012. “Hierarchical  
706 Modularity and the Evolution of Genetic Interactomes across Species.” *Molecular Cell* 46  
707 (5): 691–704.
- 708 Schaefer, Martin H, Luis Serrano, and Miguel A Andrade-Navarro. 2015. “Correcting for the  
709 Study Bias Associated with Protein–Protein Interaction Measurements Reveals Differences  
710 between Protein Degree Distributions from Different Cancer Types.” *Frontiers in Genetics*  
711 6: 260.
- 712 Schlosser, Gerhard, and Günter P Wagner. 2004. *Modularity in Development and Evolution*.  
713 University of Chicago Press.
- 714 Segal, Eran, Michael Shapira, Aviv Regev, Dana Pe’er, David Botstein, Daphne Koller, and Nir  
715 Friedman. 2003. “Module Networks: Identifying Regulatory Modules and Their Condition-  
716 Specific Regulators from Gene Expression Data.” *Nature Genetics* 34 (2): 166–76.
- 717 Skinnider, Michael A, Nichollas E Scott, Anna Prudova, Craig H Kerr, Nikolay Stoyanov, R Greg  
718 Stacey, Queenie W T Chan, David Rattray, Jörg Gsponer, and Leonard J Foster. 2021. “An  
719 Atlas of Protein-Protein Interactions across Mouse Tissues.” *Cell* 184 (15): 4073–89.
- 720 Skinnider, Michael A, R Greg Stacey, and Leonard J Foster. 2018. “Genomic Data Integration  
721 Systematically Biases Interactome Mapping.” *PLoS Computational Biology* 14 (10):  
722 e1006474.
- 723 Smith, John Maynard, and Eors Szathmary. 1997. *The Major Transitions in Evolution*. Oxford  
724 University Press.
- 725 Sonawane, Abhijeet Rajendra, John Platig, Maud Fagny, Cho-Yi Chen, Joseph Nathaniel  
726 Paulson, Camila Miranda Lopes-Ramos, Dawn Lisa DeMeo, John Quackenbush, Kimberly



- 727 Glass, and Marieke Lydia Kuijjer. 2017. “Understanding Tissue-Specific Gene Regulation.”  
728 *Cell Reports* 21 (4): 1077–88.
- 729 Sorrells, Trevor R, and Alexander D Johnson. 2015. “Making Sense of Transcription Networks.”  
730 *Cell* 161 (4): 714–23.
- 731 Stuart, Joshua M, Eran Segal, Daphne Koller, and Stuart K Kim. 2003. “A Gene-Coexpression  
732 Network for Global Discovery of Conserved Genetic Modules.” *Science* 302 (5643): 249–  
733 55.
- 734 Tanay, Amos, and Aviv Regev. 2017. “Scaling Single-Cell Genomics from Phenomenology to  
735 Mechanism.” *Nature* 541 (7637): 331–38.
- 736 Thompson, Dawn, Aviv Regev, and Sushmita Roy. 2015. “Comparative Analysis of Gene  
737 Regulatory Networks: From Network Reconstruction to Evolution.” *Annual Review of Cell  
738 and Developmental Biology* 31: 399–428.
- 739 Thrupp, Nicola, Carlo Sala Frigerio, Leen Wolfs, Nathan G Skene, Nicola Fattorelli, Suresh  
740 Poovathingal, Yannick Fourne, Paul M Matthews, Tom Theys, and Renzo Mancuso. 2020.  
741 “Single-Nucleus RNA-Seq Is Not Suitable for Detection of Microglial Activation Genes in  
742 Humans.” *Cell Reports* 32 (13): 108189.
- 743 Trapnell, Cole. 2015. “Defining Cell Types and States with Single-Cell Genomics.” *Genome  
744 Research* 25 (10): 1491–98.
- 745 Wagner, Andreas. 2012. “Metabolic Networks and Their Evolution.” In *Evolutionary Systems  
746 Biology*, 29–52. Springer.
- 747 Wolfe, Cecily J, Isaac S Kohane, and Atul J Butte. 2005. “Systematic Survey Reveals General  
748 Applicability of “Guilt-by-Association” within Gene Coexpression Networks.” *BMC  
749 Bioinformatics* 6 (1): 1–10.
- 750 Wu, Haojia, Yuhei Kirita, Erinn L Donnelly, and Benjamin D Humphreys. 2019. “Advantages of  
751 Single-Nucleus over Single-Cell RNA Sequencing of Adult Kidney: Rare Cell Types and  
752 Novel Cell States Revealed in Fibrosis.” *Journal of the American Society of Nephrology* 30  
753 (1): 23–32.
- 754 Wu, Tianzhi, Erqiang Hu, Shuangbin Xu, Meijun Chen, Pingfan Guo, Zehan Dai, Tingze Feng,  
755 Lang Zhou, Wenli Tang, and Li Zhan. 2021. “ClusterProfiler 4.0: A Universal Enrichment  
756 Tool for Interpreting Omics Data.” *The Innovation* 2 (3): 100141.
- 757 Yu, Haiyuan, Nicholas M Luscombe, Jiang Qian, and Mark Gerstein. 2003. “Genomic Analysis  
758 of Gene Expression Relationships in Transcriptional Regulatory Networks.” *Trends in  
759 Genetics* 19 (8): 422–27.
- 760 Zhang, Liqing, and Wen-Hsiung Li. 2004. “Mammalian Housekeeping Genes Evolve More  
761 Slowly than Tissue-Specific Genes.” *Molecular Biology and Evolution* 21 (2): 236–39.

762 Zhu, Jiang, Fuhong He, Songnian Hu, and Jun Yu. 2008. “On the Nature of Human  
763 Housekeeping Genes.” *Trends in Genetics* 24 (10): 481–84.

764

765 **Figure legends**

766 **Figure 1. Number of expressed genes per cell type and the number of expressed cell types**  
767 **per gene.**

768 The number of expressed genes for each brain cell type (left) and the number of cell types one  
769 gene was detected as expressed (right). The dotted vertical line on the left panel indicates the 2,368  
770 commonly expressed genes.

771

772 **Figure 2. Gene and edge commonality distributions.**

773 The commonality of an edge indicates the number of cell types one edge was detected (top). The  
774 commonality of a gene refers to the number of cell types one gene was detected as co-expressed  
775 with at least one another gene (bottom). The y-axis shows the frequency of genes or edges in the  
776 corresponding commonality score group, the numbers on top of each bar shows the counted  
777 number of genes or edges.

778

779 **Figure 3. The observed edge commonality distribution compared with the null from network**  
780 **randomization.**

781 The yellow dots show the observed edge commonality distribution and the grey dots the null  
782 distribution from network randomization. Network randomization was performed 100 times for  
783 each cell type individually with network size (number of nodes and edges) and gene degree  
784 (number of co-expressed gene partners per gene) fixed.

785

786 **Figure 4. Topological properties of shared edges and the determination of edge commonality**  
787 **cutoff value defining a core.**

788 A. Edge commonality was plotted against edge clustering coefficient. Edge commonality  
789 measures the number of cell types one edge was detected. Edge clustering coefficient  
790 shows one edge's neighborhood edge density.

791 B. The clustering coefficient values of the subgraphs (y-axis) change with increasing edge  
792 commonality cutoff values (x-axis). Progressive increasing edge commonality cutoff  
793 values were applied to the pan-network and edges whose commonality were equal or larger  
794 than the cutoff value were retained, the clustering coefficient of each resulting subgraph  
795 was calculated.

796 C. The edges composing a core cellular network at edge commonality cutoff 14 were  
797 highlighted in red.

798

799 **Figure 5. Decomposing the core subcellular network into modules.**

800 A. The heatmap of gene co-expression relationships and decomposed modules in the core  
801 cellular network. Modules which have at least 5 gene members are highlighted in different  
802 colors and numerically indexed. Gene symbols are shown on the right side of the matrix  
803 with colors matched to the corresponding module.

804 B. Network visualization of the core modules.

805 C. Enriched GO terms for each core module. We used the R package ‘clusterProfiler’ to  
806 perform gene set enrichment analysis of Gene Ontology with a Bonferroni correction and  
807 an adjusted P value cutoff of 0.05. In each module, the top terms are shown (up to 6). A  
808 full list of enriched GO terms for each module is provided in **Table S3**.

809

810 **Figure 6. Distinct evolutionary signatures of core modules.**

811 A. We assigned fly genes into different evolutionary age groups in a phylostratigraphy  
812 framework. The number of genes in each evolutionary age group were compared between  
813 commonly expressed genes and genes constituting the core using a one-sided fisher exact  
814 test. Multiple-testing was adjusted using the p.adjust function in R with the Benjamini &  
815 Hochberg method. \*\*\*, p.adjust < 0.001.

816 B. The age distribution of gene members of each core module. The size of each circle  
817 represents the proportion of genes in that evolutionary age group in the corresponding  
818 module.

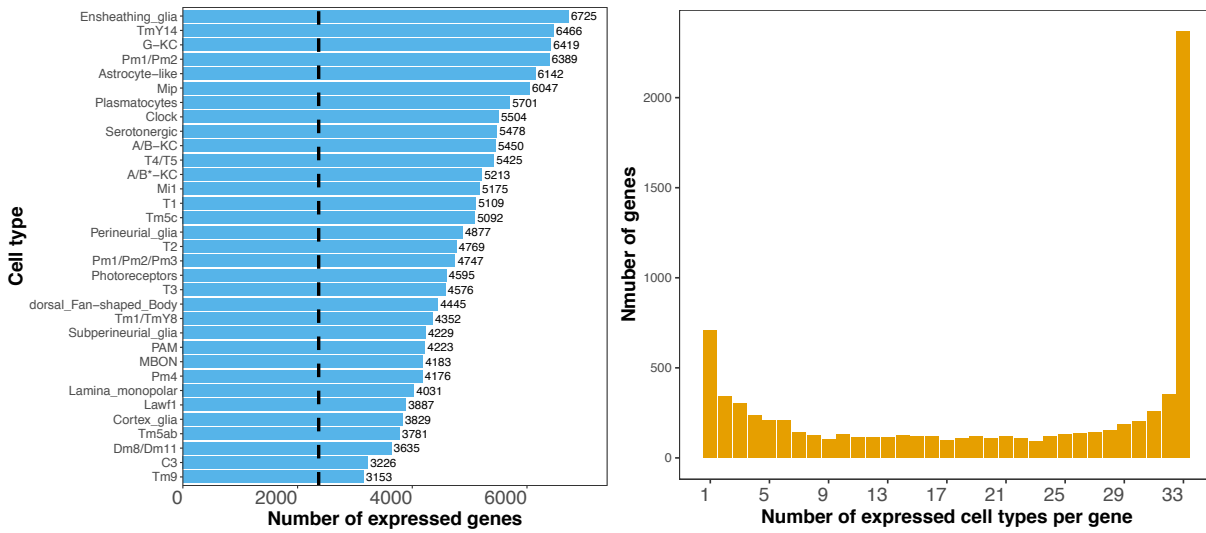

**Figure 1. Number of expressed genes per cell type and the number of expressed cell types per gene.**

The number of expressed genes for each brain cell type (left) and the number of cell types one gene was detected as expressed (right). The dotted vertical line on the left panel indicates the 2,368 commonly expressed genes.

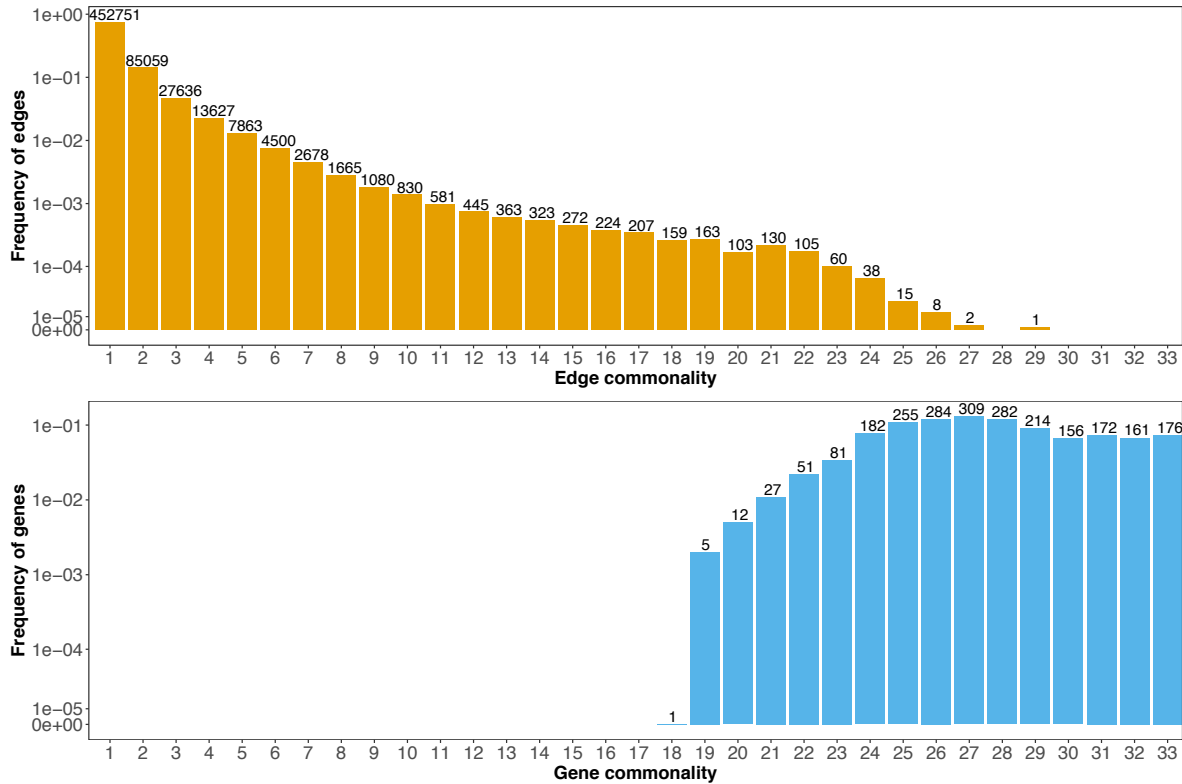

**Figure 2. Gene and edge commonality distributions.**

The commonality of an edge indicates the number of cell types one edge was detected (top). The commonality of a gene refers to the number of cell types one gene was detected as co-expressed with at least one another gene (bottom). The y-axis shows the frequency of genes or edges in the corresponding commonality score group, the numbers on top of each bar shows the counted number of genes or edges.

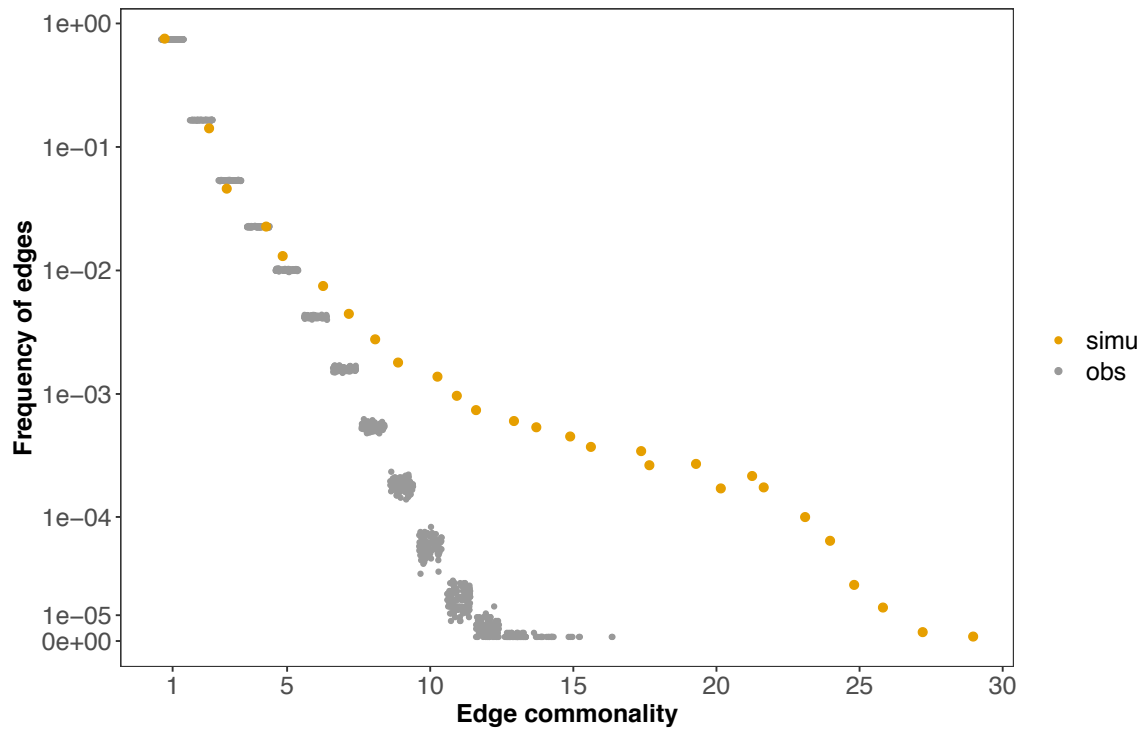

**Figure 3. The observed edge commonality distribution compared with the null from network randomization.**

The yellow dots show the observed edge commonality distribution and the grey dots the null distribution from network randomization. Network randomization was performed 100 times for each cell type individually with network size (number of nodes and edges) and gene degree (number of co-expressed gene partners per gene) fixed.

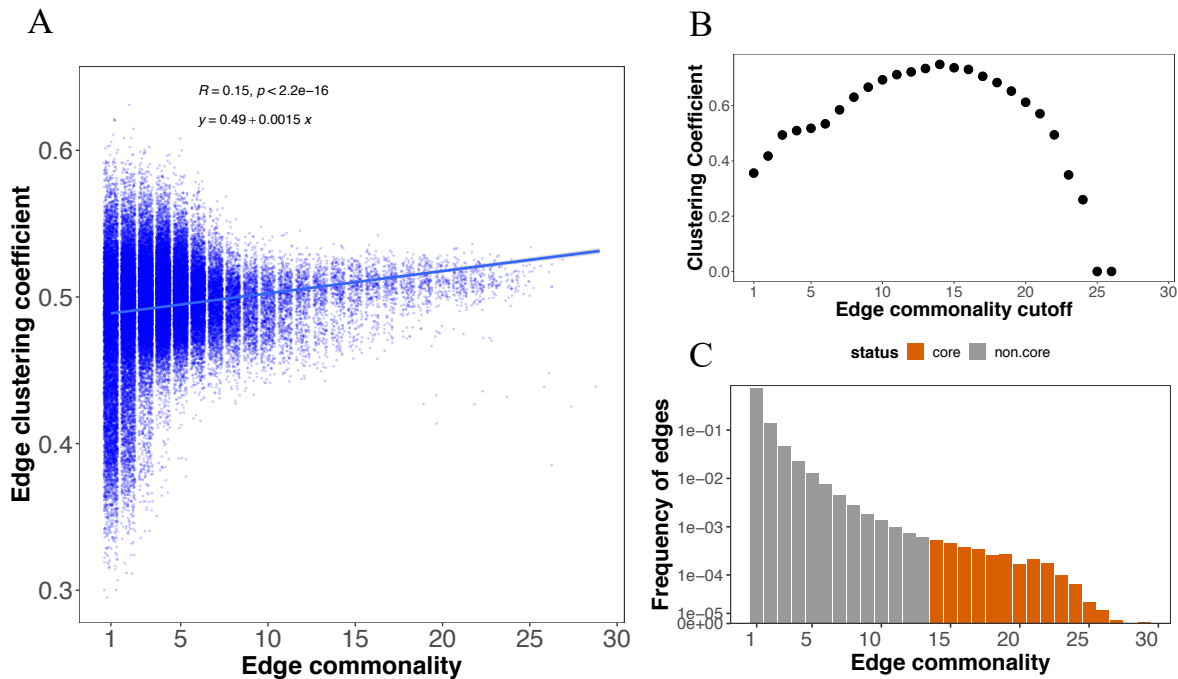

**Figure 4. Topological properties of shared edges and the determination of edge commonality cutoff value defining a core.**

A. Edge commonality was plotted against edge clustering coefficient. Edge commonality measures the number of cell types one edge was detected. Edge clustering coefficient shows one edge's neighborhood edge density.

B. The clustering coefficient values of the subgraphs (y-axis) change with increasing edge commonality cutoff values (x-axis). Progressive increasing edge commonality cutoff values were applied to the pan-network and edges whose commonality were equal or larger than the cutoff value were retained, the clustering coefficient of each resulting subgraph was calculated.

C. The edges composing a core cellular network at edge commonality cutoff 14 were highlighted in red.



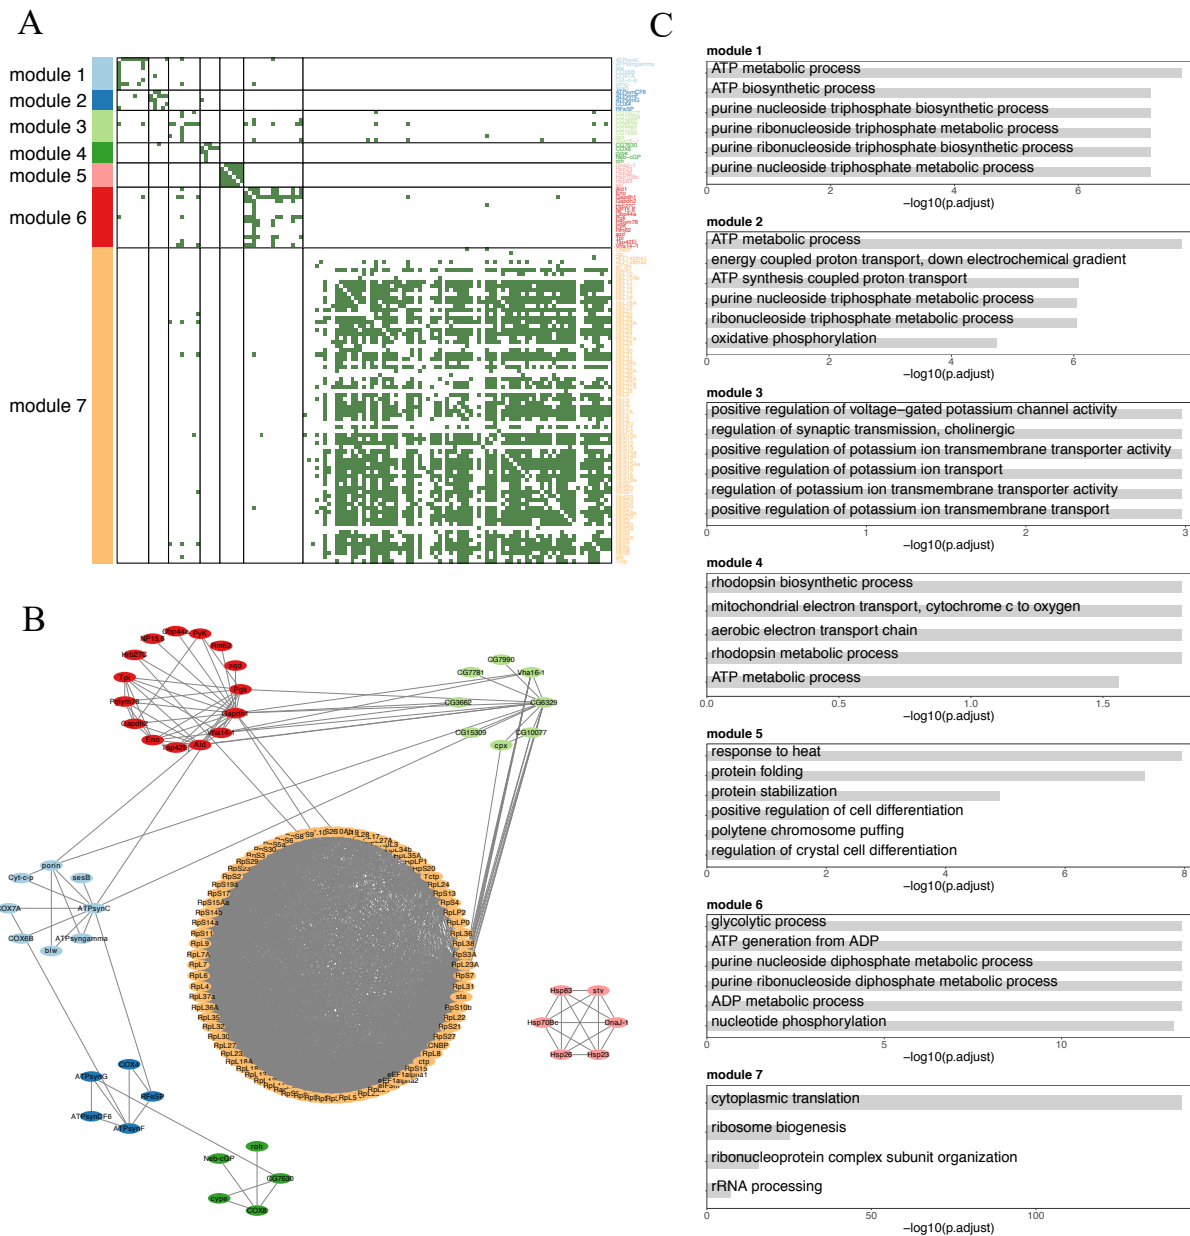

**Figure 5. Decomposing the core subcellular network into modules.**

A. The heatmap of gene co-expression relationships and decomposed modules in the core cellular network. Modules which have at least 5 gene members are highlighted in different colors and numerically indexed. Gene symbols are shown on the right side of the matrix with colors matched to the corresponding module.

B. Network visualization of the core modules.

C. Enriched GO terms for each core module. We used the R package ‘clusterProfiler’ to perform gene set enrichment analysis of Gene Ontology with a Bonferroni correction and an adjusted P value cutoff of 0.05. In each module, the top terms are shown (up to 6). A full list of enriched GO terms for each module is provided in **Table S3**.

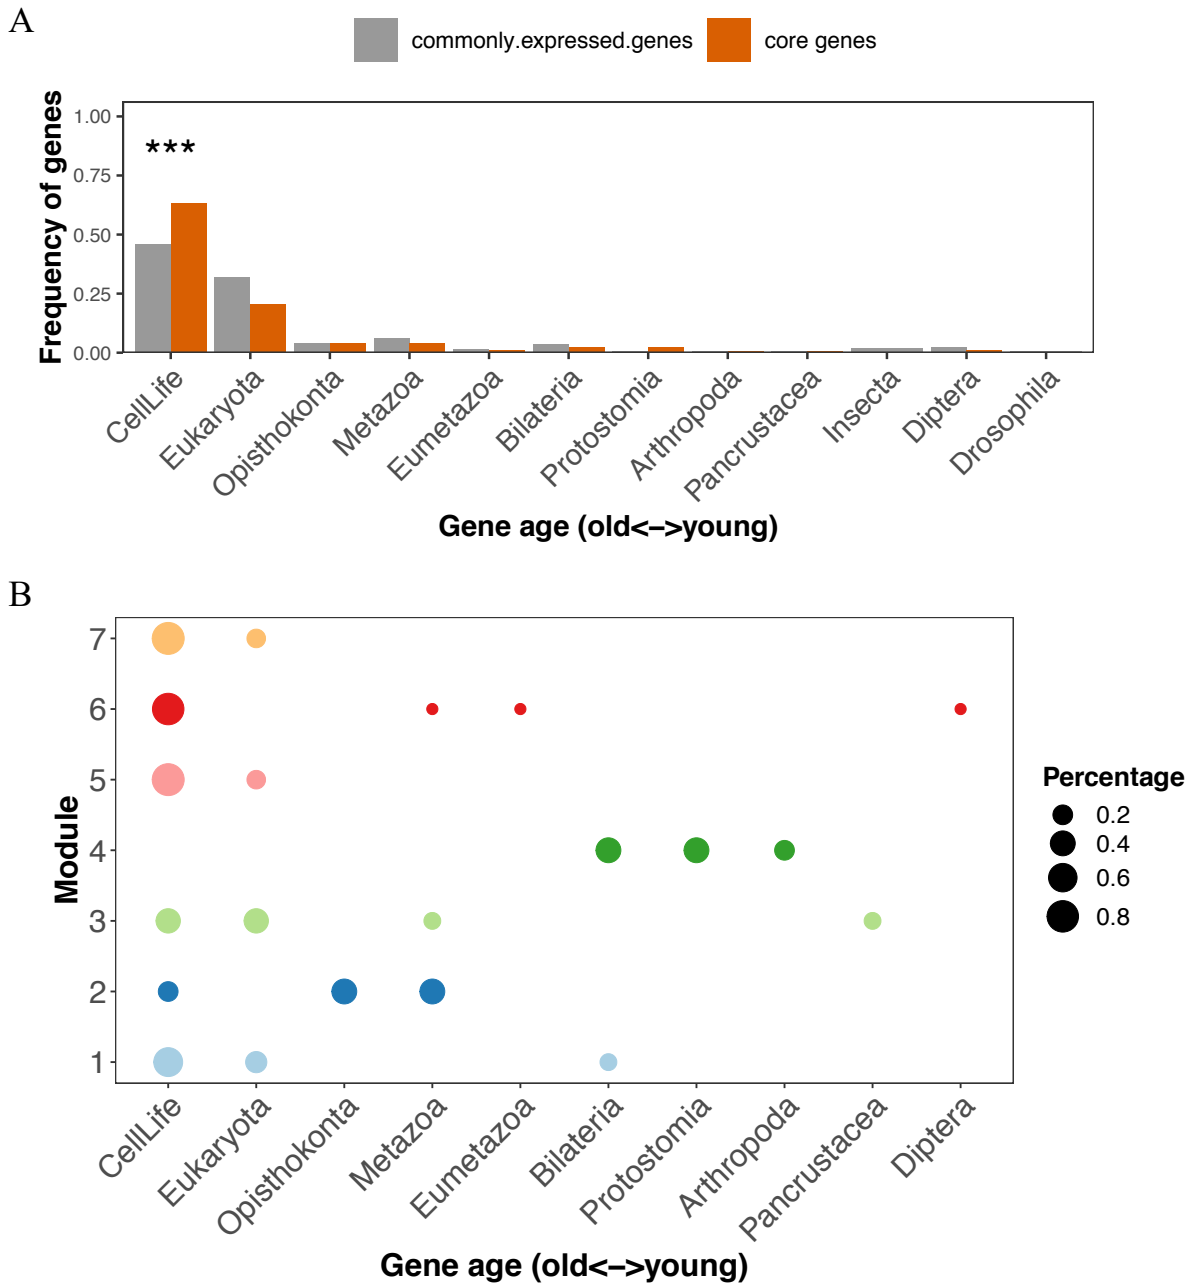

**Figure 6. Distinct evolutionary signatures of core modules.**

A. We assigned fly genes into different evolutionary age groups in a phylostratigraphy framework. The number of genes in each evolutionary age group were compared between commonly expressed genes and genes constituting the core using a one-sided fisher exact test. Multiple-testing was

adjusted using the p.adjust function in R with the Benjamini & Hochberg method. \*\*\*, p.adjust < 0.001.

B. The age distribution of gene members of each core module. The size of each circle represents the proportion of genes in that evolutionary age group in the corresponding module.
